# Supplementary material for: 2-Nitrophenol sensor-based wet-chemically prepared binary doped Co3O4/Al2O3nanosheets by an electrochemical approach
Source: Royal Society of Chemistry journal article supplement (doi:10.1039/c7ra10866d), 2018-01-01
Supplement: c7ra10866d1.pdf [file c7ra10866d1.pdf]

## 2-Nitrophenol sensor based wet-chemically prepared binary doped $\text{Co}_3\text{O}_4/\text{Al}_2\text{O}_3$ nanosheets by electrochemical approach

Mohammed M. Rahman<sup>a,b,\*</sup>, M.M. Alam<sup>c</sup>, Abdullah M. Asiri<sup>a,b</sup>

<sup>a</sup>Chemistry Department, King Abdulaziz University, Faculty of Science, Jeddah 21589, P.O. Box 80203, Saudi Arabia; <sup>b</sup>Center of Excellence for Advanced Material Research (CEAMR), King Abdulaziz University, Jeddah 21589, P.O. Box 80203, Saudi Arabia; <sup>c</sup>Department of Chemical Engineering and Polymer Science, Shahjalal University of Science and Technology, Sylhet 3100, Bangladesh

### Supporting information

Optimization of 2-Nitrophenol chemical sensor (Intra-day):

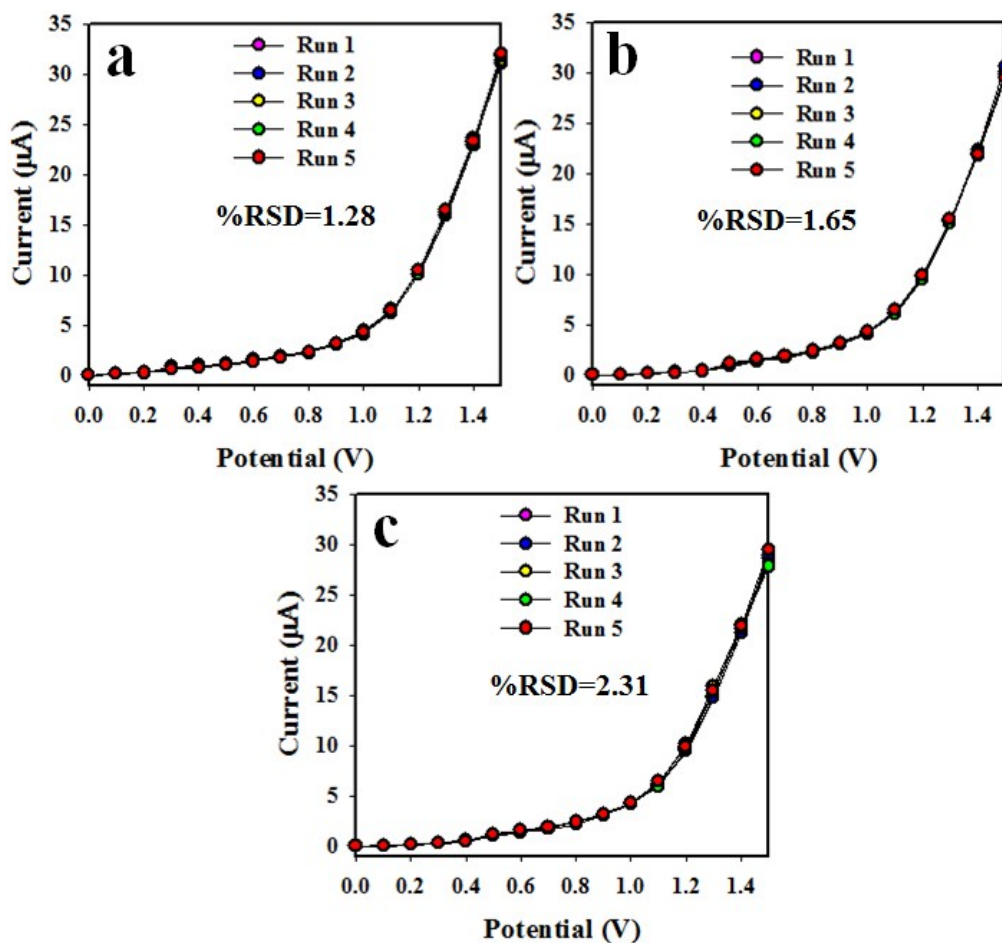

**Fig. S1** Optimization of 2-Nitrophenol chemical sensor based on  $\text{Co}_3\text{O}_4/\text{Al}_2\text{O}_3$  NSs, (a) repeatability at 0 hour, (b) repeatability after 2 hour, and (c) repeatability after 4 hours,

Optimization of 2-Nitrophenol chemical sensor (Inter-day):

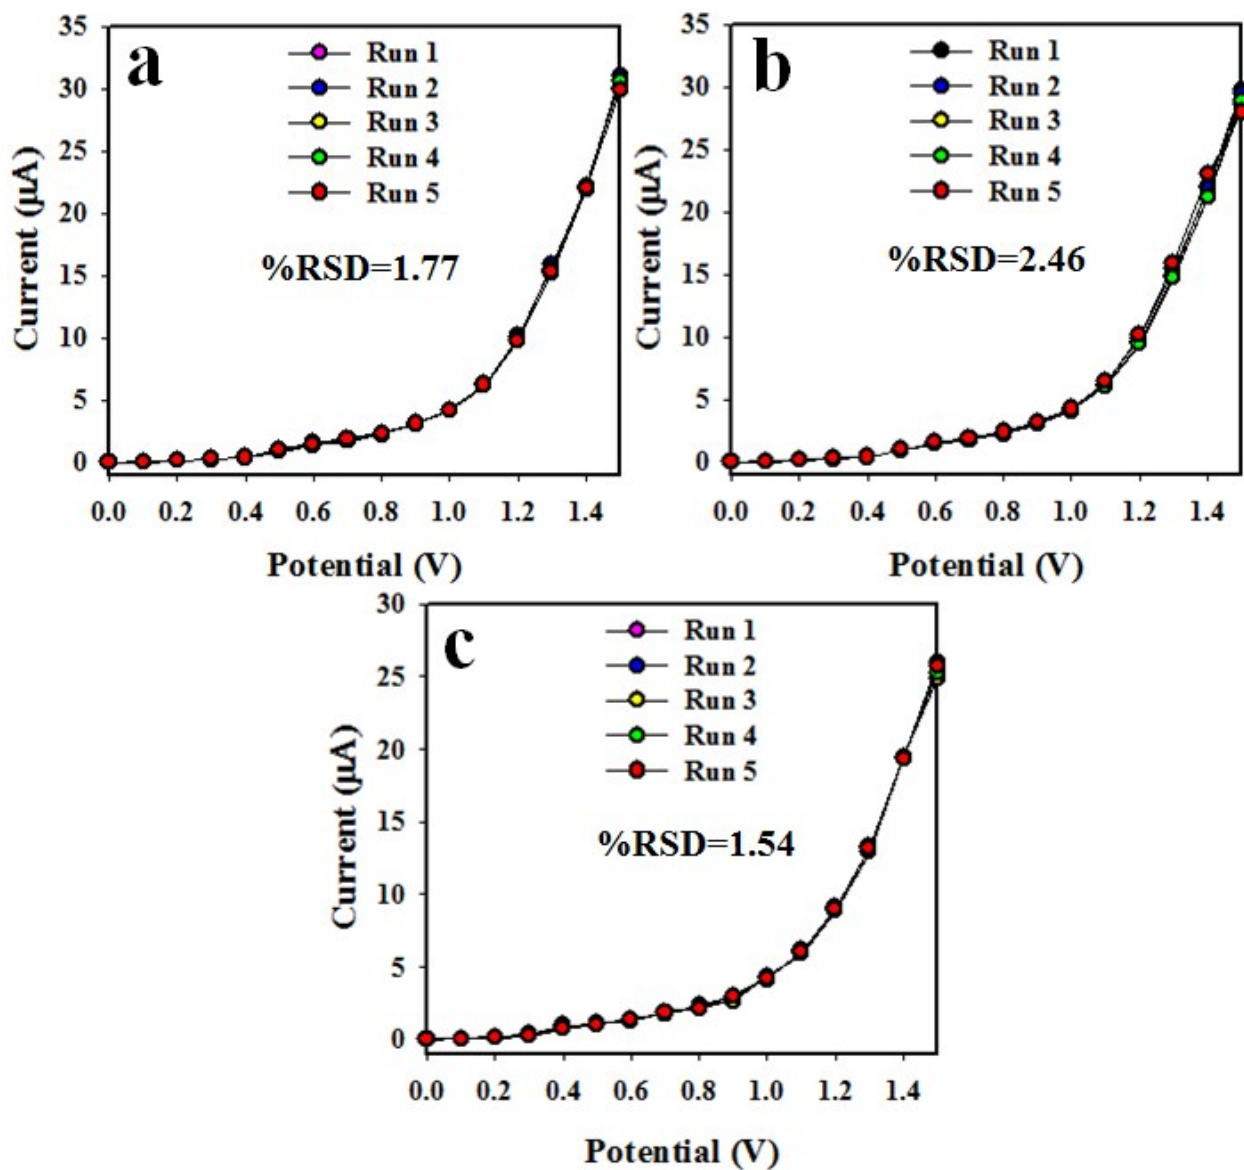

Fig. S2 Optimization of 2-Nitrophenol chemical sensor based on  $\text{Co}_3\text{O}_4/\text{Al}_2\text{O}_3$  NSs, (a) repeatability at beginning day, (b) repeatability at 2<sup>nd</sup> day, and (c) repeatability after 3<sup>rd</sup> day,

*Electrochemical responses in mixtures:*

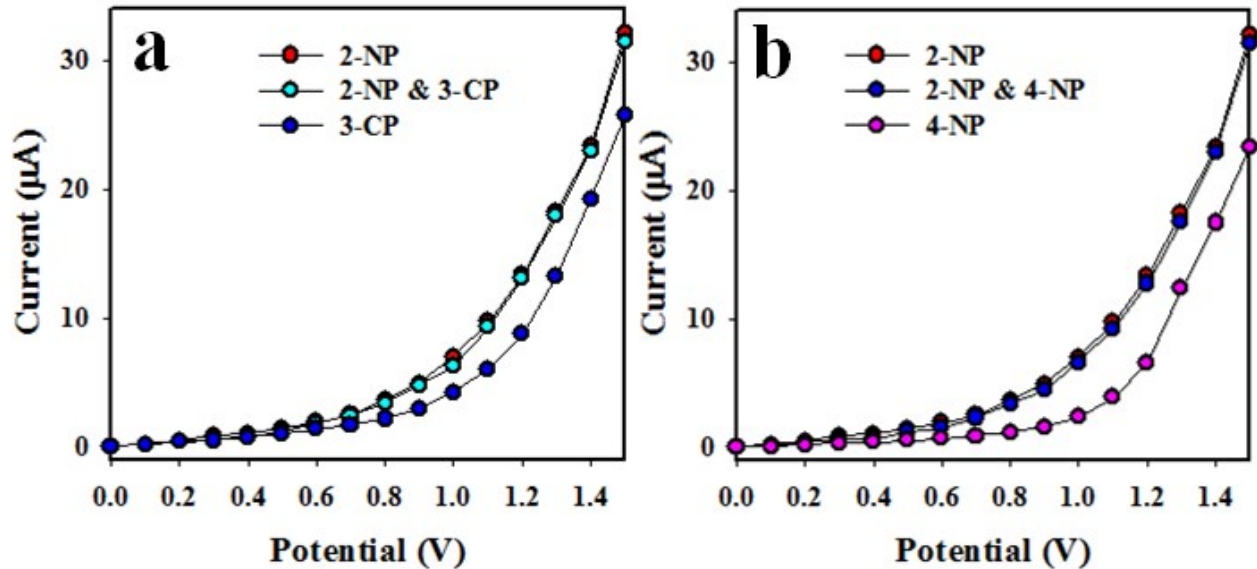

**Fig. S3** The reliable control measurements of 2-NP based on Co<sub>3</sub>O<sub>4</sub>/Al<sub>2</sub>O<sub>3</sub> NSs/GCE, (a) I-V responses in mixed or single target chemicals such as 2-NP, 2-NP+3-CP and 3-CP, (b) I-V responses in mixed or single target chemicals such as 2-NP, 2-NP+4-NP and 4-NP.

*Optical evaluations:*

The photosensitivity of prepared NSs of Co<sub>3</sub>O<sub>4</sub>/Al<sub>2</sub>O<sub>3</sub> were investigated by UV-vis analysis, which is illustrated in **Fig. S4a**. The UV-vis spectrum is a characteristic of the absorption of radiant energy of visible light and the transition of the outer electrons of the atoms from lower to higher energy level.<sup>1</sup> In this work, the UV absorption study is performed in the range of 290 to 800 nm at room temperature. The resulted spectrum contains a wider and intense peak at 307 nm (an enlarged view is shown in the inset of **Fig. S4a** and this is the characteristic band of synthesized Co<sub>3</sub>O<sub>4</sub>/Al<sub>2</sub>O<sub>3</sub> NSs. The obtained UV absorption band is authenticated for the transition of valance electron of prepared NSs from lower to higher energy level.<sup>2-4</sup> According to the equation (6); the calculated band gape energy is 4.04 eV.

$$E_{bg} = 1240 / \lambda_{max} \quad (6)$$

Here,  $E_{bg}$  = band-gap energy,  $\lambda_{max}$  = maximum absorbed wave length.<sup>5,6</sup>

To identify the functional groups existing in the prepared NSs, the  $\text{Co}_3\text{O}_4/\text{Al}_2\text{O}_3$  NSs were investigated by Fourier-transform infrared (FTIR) spectroscopy, which is presented in **Fig. S4b**. The FTIR is performed at range of  $450\text{--}4000\text{ cm}^{-1}$  and resultant peaks are obtained from the corresponding atomic or molecular vibration. As it is seen in FTIR spectrum, the several major peaks at  $536$ ,  $658$ ,  $1634$  and  $3414\text{ cm}^{-1}$  are observed. The two major peaks at  $536$  and  $658\text{ cm}^{-1}$  are associated to the stretching vibrations of  $\text{Co-O}$ . This observation is consistent with those reported by previous authors.<sup>7-9</sup> The peaks at  $1634$  and  $3400\text{ cm}^{-1}$  are assigned to  $\text{O-H}$  stretching vibration mode<sup>10-13</sup> due to the adsorption of water from environment.

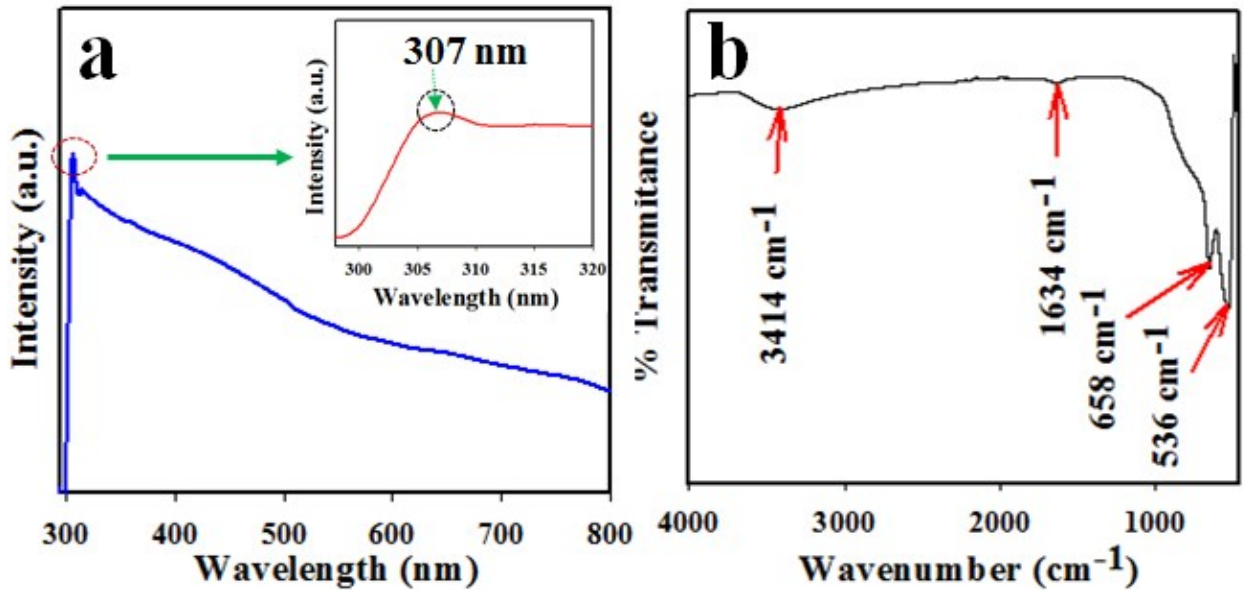

**Fig. S4.** Optical characterization of doped  $\text{Co}_3\text{O}_4/\text{Al}_2\text{O}_3$  nanomaterials. (a) UV/vis. Spectroscopy and (b) FTIR spectroscopy

## XPS analysis of doped $\text{Co}_3\text{O}_4/\text{Al}_2\text{O}_3$ nanomaterials:

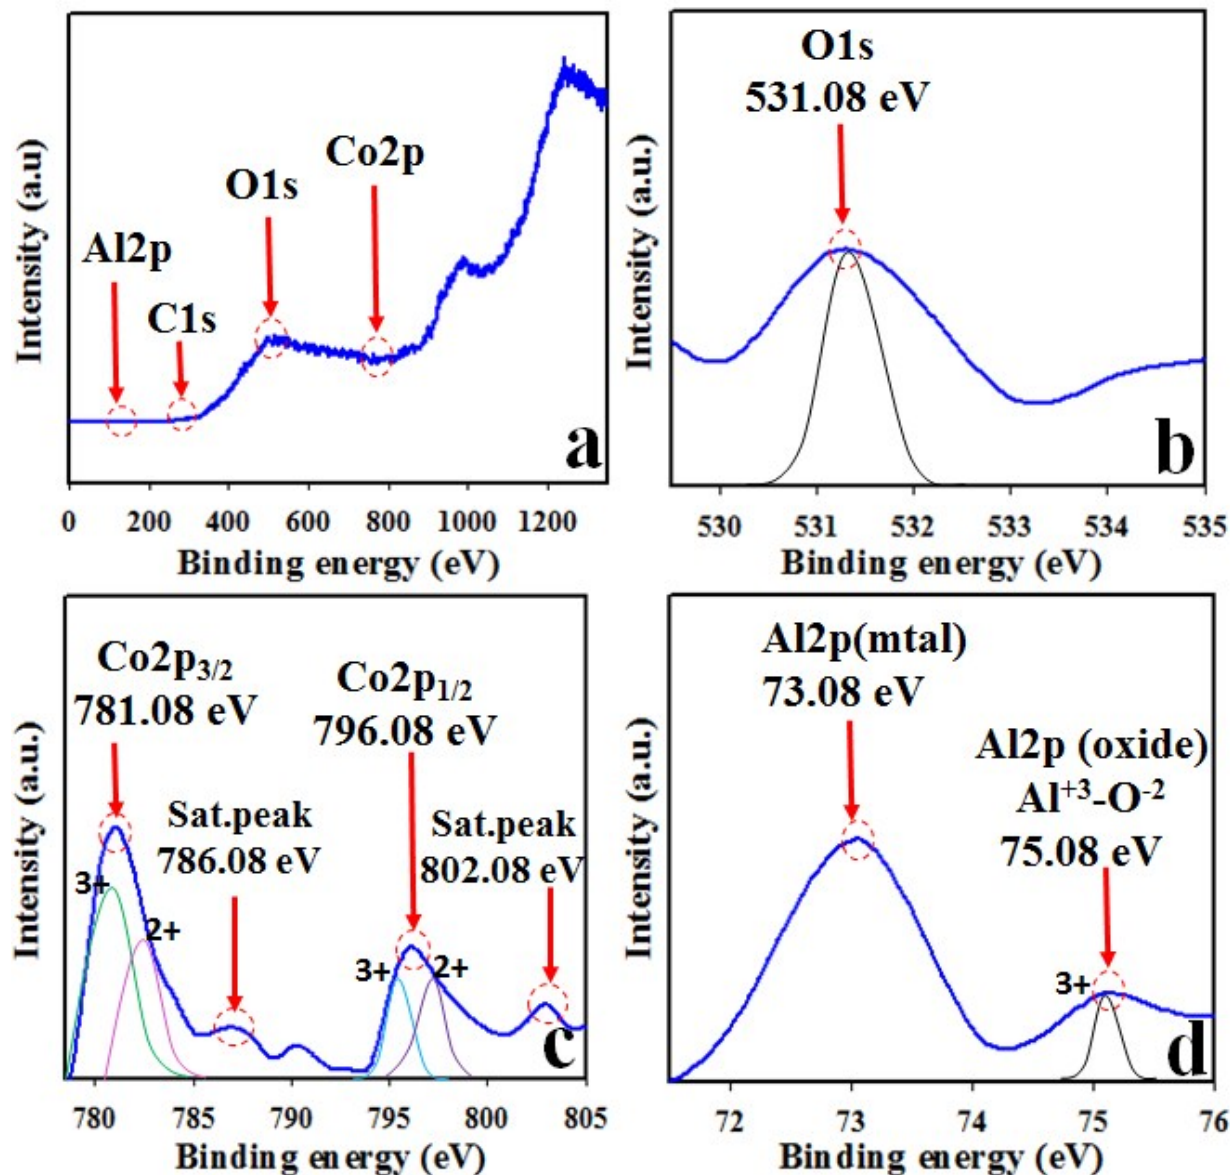

Fig. S5. XPS analysis of doped  $\text{Co}_3\text{O}_4/\text{Al}_2\text{O}_3$  nanomaterials

## References:

1. M. M. Rahman, A. Jamal, S. B. Khan and M. Faisal, *J. Phys. Chem. C*, 2011, 115, 9503–9510.
2. M. M. Rahman, G. Gruner, M. S. Al-Ghamdi, M. A. Daous, S. B. Khan and A. M. Asiri, *Chemistry Central Journal*, 2013, 7, 60.
3. R. Ramasamy, K. Ramachandran, G. G. Philip, R. Ramachandran, H. A. Therese and G. G. kumar, *RSC Adv.*, 2015, 5, 76538–76547.
4. S. Kumar and A.K. Ojha, *RSC Adv.*, 2016, 6, 8651–8660.
5. M. M. Rahman, M. M. Alam, A. M. Asiri and M. A. Islam, *Talanta*, 2017, 170, 215–223.
6. M. M. Rahman, M. M. Alam, A. M. Asiri and M. A. Islam, *RSC Adv.*, 2017, 7, 22627–22639.
7. S. Shahabuddin, N. M. Sarih, F. H. Ismail, M. M. Shahid and N. M. Huang, *RSC Adv.*, 2015, 5, 83857–83867.
8. X. Xia, J. Tu, Y. Zhang, Y. Mai, X. Wang, C. Gu and X. Zhao, *RSC Advances*, 2012, 2, 1835–1841.

9. G. A. M. Ali, O. A. Fouad, S. A. Makhlouf, M. M. Yusoff and K. F. Chong, *J. Solid State Electrochem*, 2014, 18, 2505–2512.
10. H. Xu, Z. Hai, J. Diwu, Q. Zhang, L. Gao, D. Cui, J. Zang, J. Liu and C. Xue, *Journal of Nanomaterials*, 2015, 8.
11. X. Huang, Z. Chen, T. Gao, Q. Huang, F. Niu, L. Qin and Y. Huang, *Energy Technol.*, 2013, 1, 751 – 756.
12. M. Nidhin, K. J. Sreeram and B. U. Nair, *Chemical Engineering Journal*, 2012, 185, 352– 357.
13. V. K. Patel, J. R. Saurav, K. Gangopadhyay, S. Gangopadhyay and S. Bhattachary, *RSC Adv.*, 2015, 5, 21471–21479.
